# Supplementary material
Source: MDPI journal article supplement (https://www.mdpi.com/2304-6740/5/2/28)

# checkCIF/PLATON report

Structure factors have been supplied for datablock(s) tps214orthoacent

THIS REPORT IS FOR GUIDANCE ONLY. IF USED AS PART OF A REVIEW PROCEDURE FOR PUBLICATION, IT SHOULD NOT REPLACE THE EXPERTISE OF AN EXPERIENCED CRYSTALLOGRAPHIC REFEREE.

No syntax errors found.      CIF dictionary      Interpreting this report

## Datablock: tps214orthoacent

---

Bond precision:    C-C = 0.0053 Å                      Wavelength=0.71073

Cell:                      a=10.287(2)              b=11.429(2)              c=20.495(4)  
                                alpha=90              beta=90              gamma=90

Temperature:              100 K

|                | Calculated      | Reported        |
|----------------|-----------------|-----------------|
| Volume         | 2409.6(8)       | 2409.6(8)       |
| Space group    | P 21 21 21      | P 21 21 21      |
| Hall group     | P 2ac 2ab       | P 2ac 2ab       |
| Moiety formula | C22 H37 K O2 Si | C22 H37 K O2 Si |
| Sum formula    | C22 H37 K O2 Si | C22 H37 K O2 Si |
| Mr             | 400.71          | 400.70          |
| Dx,g cm-3      | 1.105           | 1.096           |
| Z              | 4               | 4               |
| Mu (mm-1)      | 0.282           | 0.282           |
| F000           | 872.0           | 872.0           |
| F000'          | 873.41          |                 |
| h,k,lmax       | 12,14,25        | 12,14,25        |
| Nref           | 4777[ 2714]     | 4731            |
| Tmin,Tmax      | 0.935,0.971     | 0.925,0.971     |
| Tmin'          | 0.911           |                 |

Correction method= # Reported T Limits: Tmin=0.925 Tmax=0.971  
AbsCorr = INTEGRATION

Data completeness= 1.74/0.99                      Theta(max)= 26.104

R(reflections)= 0.0380( 3955)                      wR2(reflections)= 0.0913( 4731)

S = 0.993                      Npar= 260

---

The following ALERTS were generated. Each ALERT has the format  
**test-name\_ALERT\_alert-type\_alert-level.**  
Click on the hyperlinks for more details of the test.

---

### ● Alert level C

ABSTY02\_ALERT\_1\_C An \_exptl\_absorpt\_correction\_type has been given without  
a literature citation. This should be contained in the  
\_exptl\_absorpt\_process\_details field.  
Absorption correction given as integration

REFLE01\_ALERT\_3\_C The \_reflns\_threshold\_multiplier given is >= 4  
Premultiplier = 4.00

REFLE01\_ALERT\_3\_C The \_reflns\_threshold\_multiplier given is >= 4  
Premultiplier = 4.00

PLAT220\_ALERT\_2\_C Non-Solvent Resd 1 C Ueq(max)/Ueq(min) Range 4.9 Ratio

PLAT241\_ALERT\_2\_C High 'MainMol' Ueq as Compared to Neighbors of C15 Check

PLAT242\_ALERT\_2\_C Low 'MainMol' Ueq as Compared to Neighbors of C16 Check

PLAT340\_ALERT\_3\_C Low Bond Precision on C-C Bonds ..... 0.00529 Ang.

PLAT911\_ALERT\_3\_C Missing # FCF Refl Between THmin & STh/L= 0.600 8 Report

---

### ● Alert level G

PLAT004\_ALERT\_5\_G Polymeric Structure Found with Maximum Dimension 1 Info

PLAT066\_ALERT\_1\_G Predicted and Reported Tmin&Tmax Range Identical ? Check

PLAT300\_ALERT\_4\_G Atom Site Occupancy of C20A is Constrained at 0.5 Check

PLAT300\_ALERT\_4\_G Atom Site Occupancy of C20B is Constrained at 0.5 Check

PLAT300\_ALERT\_4\_G Atom Site Occupancy of C21A is Constrained at 0.5 Check

PLAT300\_ALERT\_4\_G Atom Site Occupancy of C21B is Constrained at 0.5 Check

PLAT300\_ALERT\_4\_G Atom Site Occupancy of H19A is Constrained at 0.5 Check

PLAT300\_ALERT\_4\_G Atom Site Occupancy of H19B is Constrained at 0.5 Check

PLAT300\_ALERT\_4\_G Atom Site Occupancy of H19C is Constrained at 0.5 Check

PLAT300\_ALERT\_4\_G Atom Site Occupancy of H19D is Constrained at 0.5 Check

PLAT300\_ALERT\_4\_G Atom Site Occupancy of H20A is Constrained at 0.5 Check

PLAT300\_ALERT\_4\_G Atom Site Occupancy of H20B is Constrained at 0.5 Check

PLAT300\_ALERT\_4\_G Atom Site Occupancy of H20C is Constrained at 0.5 Check

PLAT300\_ALERT\_4\_G Atom Site Occupancy of H20D is Constrained at 0.5 Check

PLAT300\_ALERT\_4\_G Atom Site Occupancy of H21A is Constrained at 0.5 Check

PLAT300\_ALERT\_4\_G Atom Site Occupancy of H21B is Constrained at 0.5 Check

PLAT300\_ALERT\_4\_G Atom Site Occupancy of H21C is Constrained at 0.5 Check

PLAT300\_ALERT\_4\_G Atom Site Occupancy of H21D is Constrained at 0.5 Check

PLAT300\_ALERT\_4\_G Atom Site Occupancy of H22A is Constrained at 0.5 Check

PLAT300\_ALERT\_4\_G Atom Site Occupancy of H22B is Constrained at 0.5 Check

PLAT300\_ALERT\_4\_G Atom Site Occupancy of H22C is Constrained at 0.5 Check

PLAT300\_ALERT\_4\_G Atom Site Occupancy of H22D is Constrained at 0.5 Check

PLAT301\_ALERT\_3\_G Main Residue Disorder .....(Resd 1).. 8 % Note

PLAT343\_ALERT\_2\_G Unusual Angle Range in Main Residue for C6 Check

PLAT343\_ALERT\_2\_G Unusual Angle Range in Main Residue for C7 Check

PLAT343\_ALERT\_2\_G Unusual Angle Range in Main Residue for C8 Check

PLAT343\_ALERT\_2\_G Unusual Angle Range in Main Residue for C9 Check

PLAT343\_ALERT\_2\_G Unusual Angle Range in Main Residue for C10 Check

PLAT367\_ALERT\_2\_G Long? C(sp?)-C(sp?) Bond C7 - C11 .. 1.51 Ang.

PLAT367\_ALERT\_2\_G Long? C(sp?)-C(sp?) Bond C8 - C12 .. 1.51 Ang.

PLAT367\_ALERT\_2\_G Long? C(sp?)-C(sp?) Bond C9 - C13 .. 1.51 Ang.

PLAT367\_ALERT\_2\_G Long? C(sp?)-C(sp?) Bond C10 - C14 .. 1.50 Ang.

PLAT912\_ALERT\_4\_G Missing # of FCF Reflections Above STh/L= 0.600 18 Note

PLAT978\_ALERT\_2\_G Number C-C Bonds with Positive Residual Density. 3 Note

---

0 **ALERT level A** = Most likely a serious problem - resolve or explain  
0 **ALERT level B** = A potentially serious problem, consider carefully  
8 **ALERT level C** = Check. Ensure it is not caused by an omission or oversight  
34 **ALERT level G** = General information/check it is not something unexpected

2 ALERT type 1 CIF construction/syntax error, inconsistent or missing data

13 ALERT type 2 Indicator that the structure model may be wrong or deficient  
5 ALERT type 3 Indicator that the structure quality may be low  
21 ALERT type 4 Improvement, methodology, query or suggestion  
1 ALERT type 5 Informative message, check

---

---

It is advisable to attempt to resolve as many as possible of the alerts in all categories. Often the minor alerts point to easily fixed oversights, errors and omissions in your CIF or refinement strategy, so attention to these fine details can be worthwhile. In order to resolve some of the more serious problems it may be necessary to carry out additional measurements or structure refinements. However, the purpose of your study may justify the reported deviations and the more serious of these should normally be commented upon in the discussion or experimental section of a paper or in the "special\_details" fields of the CIF. checkCIF was carefully designed to identify outliers and unusual parameters, but every test has its limitations and alerts that are not important in a particular case may appear. Conversely, the absence of alerts does not guarantee there are no aspects of the results needing attention. It is up to the individual to critically assess their own results and, if necessary, seek expert advice.

### **Publication of your CIF in IUCr journals**

A basic structural check has been run on your CIF. These basic checks will be run on all CIFs submitted for publication in IUCr journals (*Acta Crystallographica*, *Journal of Applied Crystallography*, *Journal of Synchrotron Radiation*); however, if you intend to submit to *Acta Crystallographica Section C* or *E* or *IUCrData*, you should make sure that full publication checks are run on the final version of your CIF prior to submission.

### **Publication of your CIF in other journals**

Please refer to the *Notes for Authors* of the relevant journal for any special instructions relating to CIF submission.

---

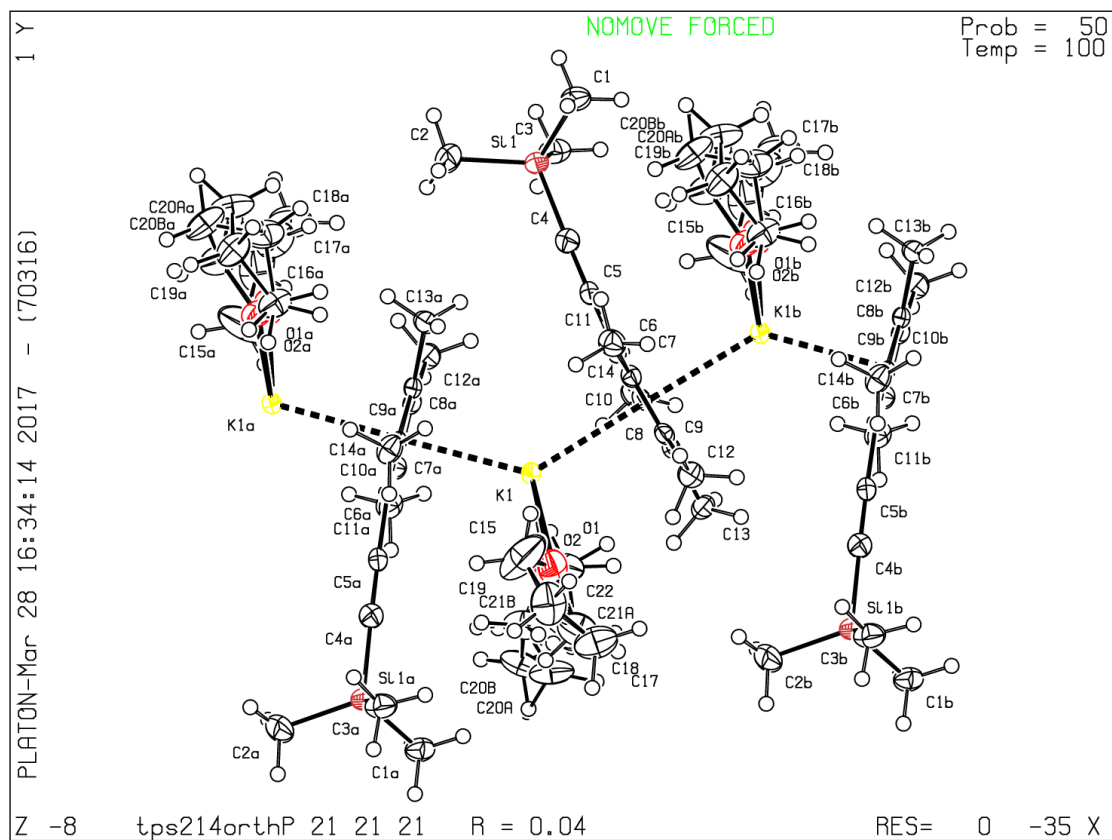

Supplement: s1 [file s1]
