# Supplementary material
Source: MDPI journal article supplement (https://www.mdpi.com/2304-6740/5/2/28)

Supplementary Information for

**Alkali and Alkaline Earth Metal Complexes Ligated by an Acetyl  
substituted Cyclopentadienyl Ligand**

*Tim Seifert and Peter W. Roesky\**

Institute of Inorganic Chemistry, Karlsruhe Institute of Technology, 76131 Karlsruhe,

Germany

Table of contents

|                               |     |
|-------------------------------|-----|
| 1. Crystallographic data..... | S2  |
| 2. NMR Spectra.....           | S6  |
| 3. IR Spectra.....            | S9  |
| 4. Mass spectra.....          | S11 |

## 1. Crystallographic data

| Compound                 | 1                                                   | 2                                                  | 3                                                                                             |
|--------------------------|-----------------------------------------------------|----------------------------------------------------|-----------------------------------------------------------------------------------------------|
| Formula                  | C <sub>26</sub> H <sub>45</sub> NaO <sub>3</sub> Si | C <sub>22</sub> H <sub>37</sub> KO <sub>2</sub> Si | C <sub>44</sub> H <sub>74</sub> Ca <sub>2</sub> I <sub>2</sub> O <sub>4</sub> Si <sub>2</sub> |
| $D_{calc./g\ cm^{-3}}$   | 1.083                                               | 1.096                                              | 1.160                                                                                         |
| $\mu/mm^{-1}$            | 0.121                                               | 0.282                                              | 1.278                                                                                         |
| Formula Weight           | 456.70                                              | 400.70                                             | 1057.17                                                                                       |
| Colour                   | clear colourless                                    | colorless                                          | yellow                                                                                        |
| Shape                    | plate                                               | plate                                              | block                                                                                         |
| Size/mm <sup>3</sup>     | 0.30×0.16×0.07                                      | 0.33×0.20×0.10                                     | 0.33×0.29×0.28                                                                                |
| $T/K$                    | 100                                                 | 100                                                | 220                                                                                           |
| Crystal System           | monoclinic                                          | orthorhombic                                       | monoclinic                                                                                    |
| Flack parameter          |                                                     | 0.03(4)                                            |                                                                                               |
| Space Group              | P2 <sub>1</sub> /c                                  | P2 <sub>1</sub> 2 <sub>1</sub> 2 <sub>1</sub>      | P2 <sub>1</sub> /n                                                                            |
| $a/\text{\AA}$           | 8.1123(16)                                          | 10.287(2)                                          | 9.4746(4)                                                                                     |
| $b/\text{\AA}$           | 14.126(3)                                           | 11.429(2)                                          | 14.9924(8)                                                                                    |
| $c/\text{\AA}$           | 24.766(5)                                           | 20.495(4)                                          | 21.7467(8)                                                                                    |
| $\beta/^\circ$           | 99.36(3)                                            |                                                    | 101.490(3)                                                                                    |
| $V/\text{\AA}^3$         | 2800.4(10)                                          | 2409.6(8)                                          | 3027.1(2)                                                                                     |
| $Z$                      | 4                                                   | 4                                                  | 2                                                                                             |
| $Z'$                     | 1                                                   | 1                                                  | 0.5                                                                                           |
| Wavelength/ $\text{\AA}$ | 0.71073                                             | 0.71073                                            | 0.71073                                                                                       |
| Radiation type           | Mo K $\alpha$                                       | Mo K $\alpha$                                      | MoK $\alpha$                                                                                  |
| $\theta_{min}/^\circ$    | 1.665                                               | 1.987                                              | 1.911                                                                                         |
| $\theta_{max}/^\circ$    | 26.088                                              | 26.104                                             | 26.125                                                                                        |
| Measured Refl.           | 12871                                               | 19379                                              | 14525                                                                                         |
| Independent Refl.        | 5468                                                | 4731                                               | 5910                                                                                          |
| Reflections Used         | 2890                                                | 3955                                               | 3630                                                                                          |
| $R_{int}$                | 0.1124                                              | 0.0584                                             | 0.0286                                                                                        |
| Parameters               | 287                                                 | 242                                                | 251                                                                                           |
| Restraints               | 40                                                  | 0                                                  | 0                                                                                             |
| Largest Peak             | 0.955                                               | 0.337                                              | 0.587                                                                                         |
| Deepest Hole             | -0.997                                              | -0.342                                             | -0.779                                                                                        |
| GooF                     | 1.003                                               | 0.993                                              | 0.975                                                                                         |
| $wR_2$ (all data)        | 0.2846                                              | 0.0913                                             | 0.1181                                                                                        |
| $wR_2$                   | 0.2343                                              | 0.0872                                             | 0.1089                                                                                        |
| $R_I$ (all data)         | 0.1644                                              | 0.0503                                             | 0.0636                                                                                        |
| $R_I$                    | 0.0931                                              | 0.0380                                             | 0.0392                                                                                        |

**Figure S1:** Molecular structure of **1** in the solid-state structure. Hydrogen atoms and solvent molecules are omitted for clarity. Thermal ellipsoids are drawn to encompass 50 % probability.

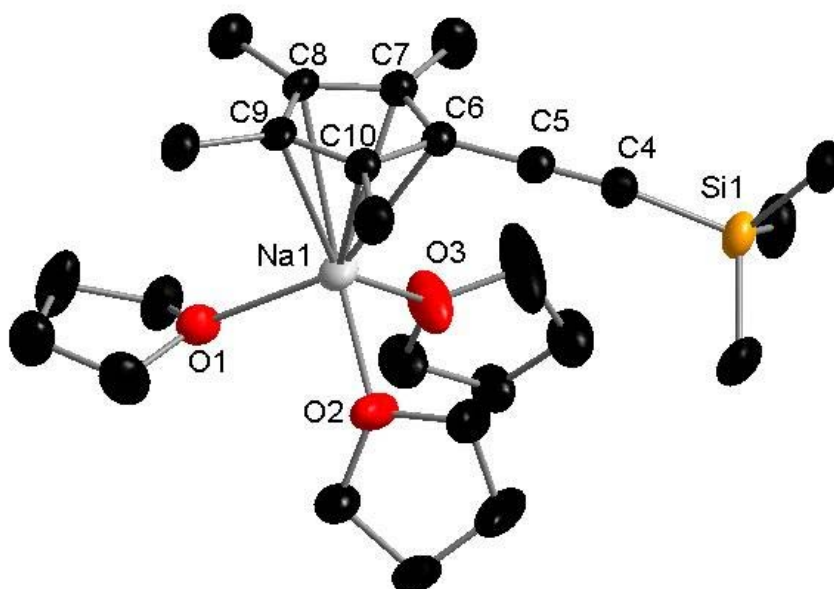

**Figure S2:** Molecular structure of **2** in the solid-state structure. Hydrogen atoms and solvent molecules are omitted for clarity. Thermal ellipsoids are drawn to encompass 50 % probability.

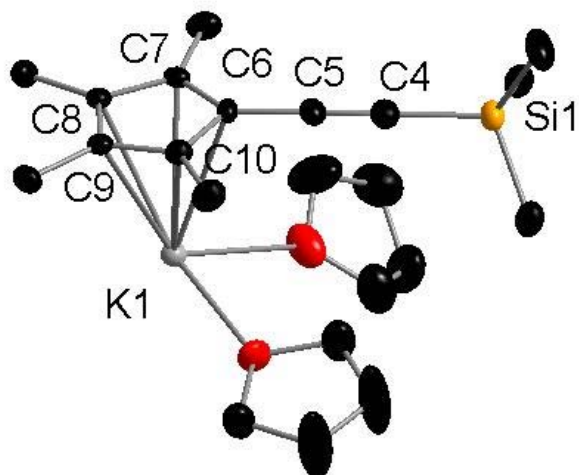

**Figure S3:** Molecular structure of **3** in the solid-state structure. Hydrogen atoms and solvent molecules are omitted for clarity. Thermal ellipsoids are drawn to encompass 50 % probability.

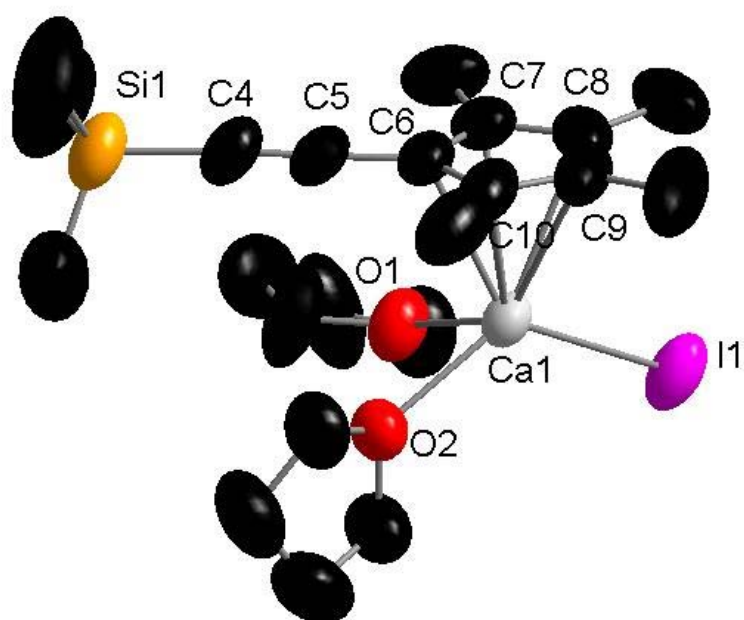

## 2. NMR Spectra

### 2.1 $[\text{NaCpMe}_4(\text{C}\equiv\text{CSiMe}_3)(\text{THF})_3]$ (**1**)

$^1\text{H}$  NMR (298K, 300 MHz,  $\text{THF-D}_8$ )

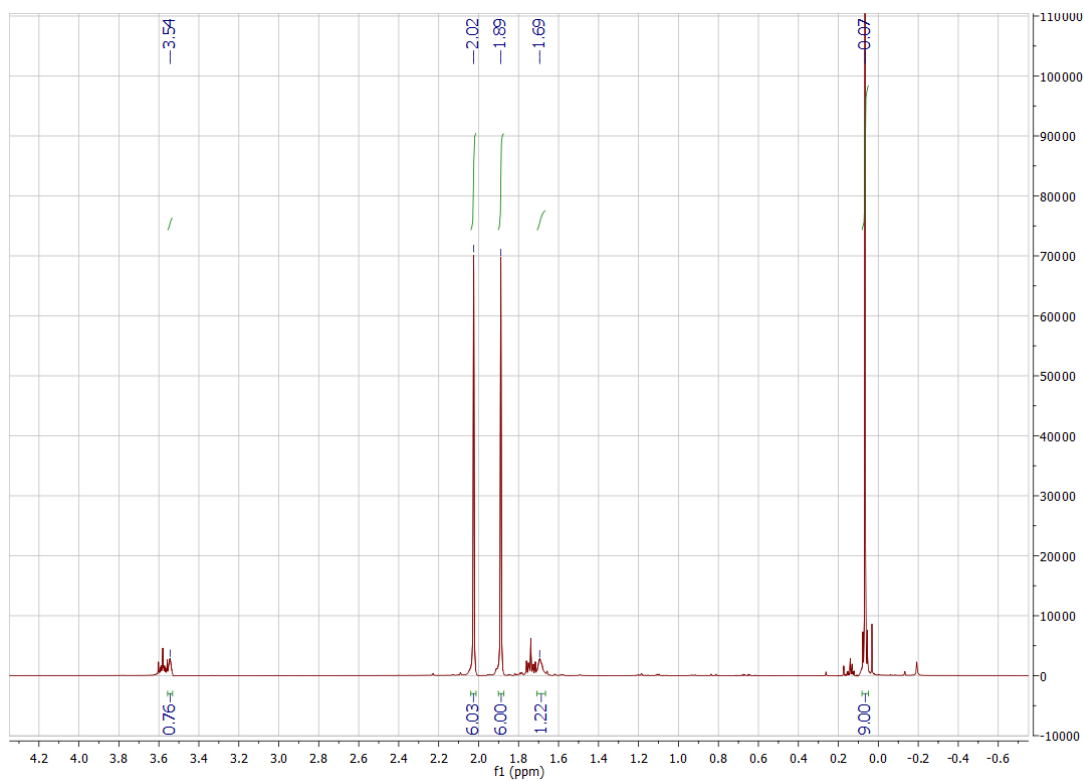

$^{13}\text{C}\{^1\text{H}\}$  NMR (298K, 75 MHz,  $\text{THF-D}_8$ )

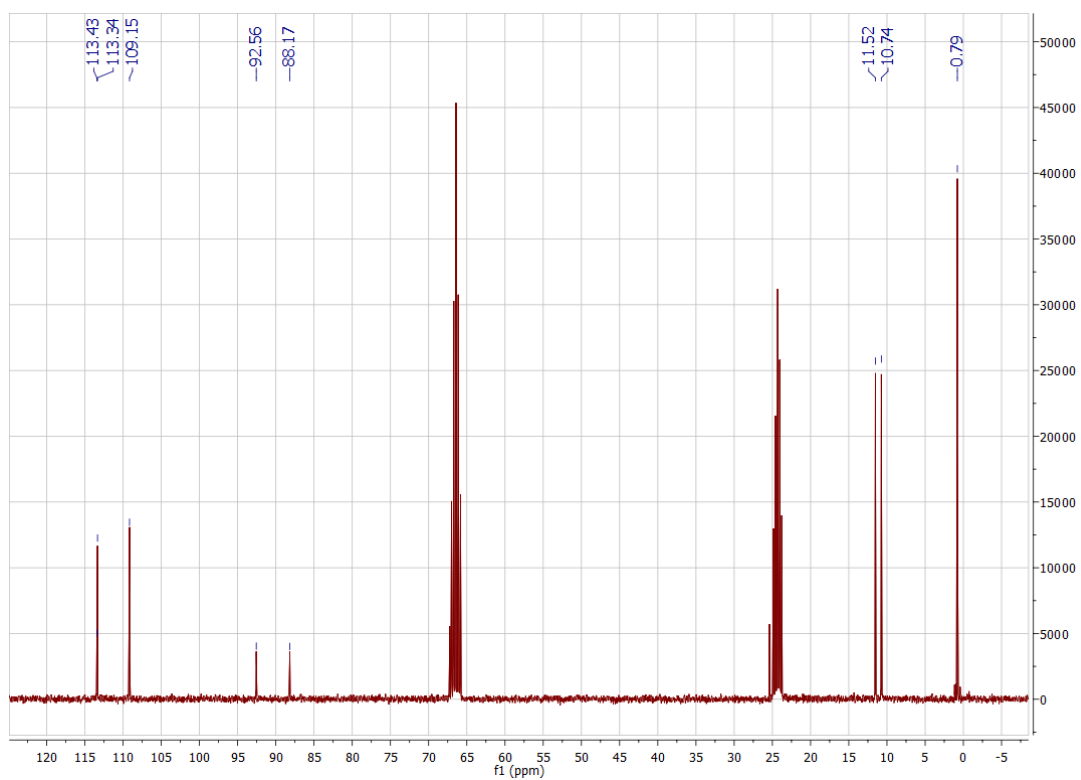

2.2 [KCpMe<sub>4</sub>(C≡CSiMe<sub>3</sub>)(THF)<sub>2</sub>]<sub>n</sub> (**2**)

<sup>1</sup>H NMR (298K, 300 MHz, THF-D<sub>8</sub>)

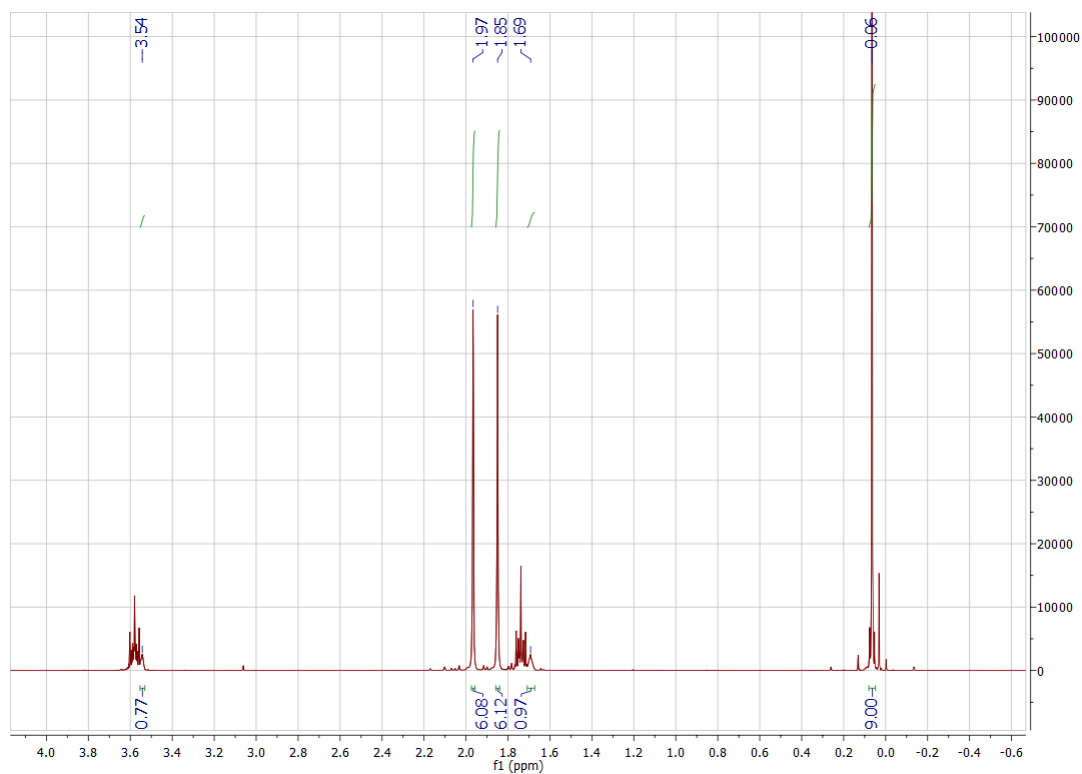

<sup>13</sup>C{<sup>1</sup>H} NMR (298K, 75 MHz, THF-D<sub>8</sub>)

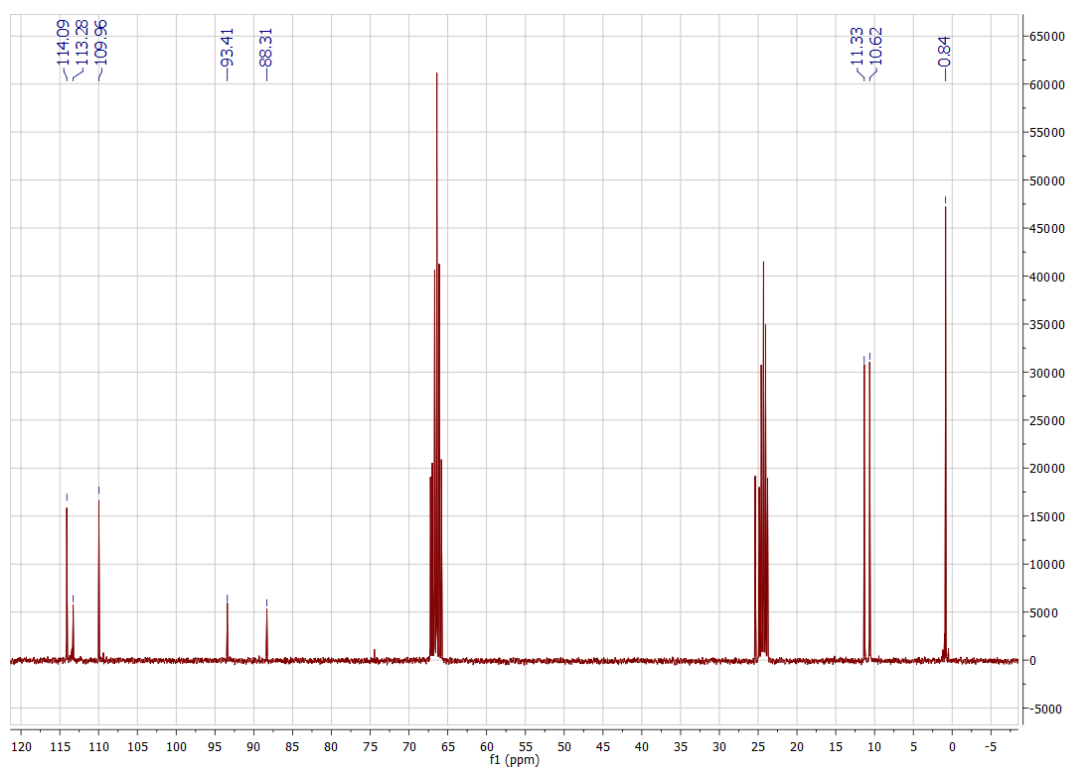

### 2.3 [CpMe<sub>4</sub>(C≡CSiMe<sub>3</sub>)CaI(THF)<sub>2</sub>]<sub>2</sub> (**3**)

<sup>1</sup>H NMR (298K, 300 MHz, THF-D<sub>8</sub>)

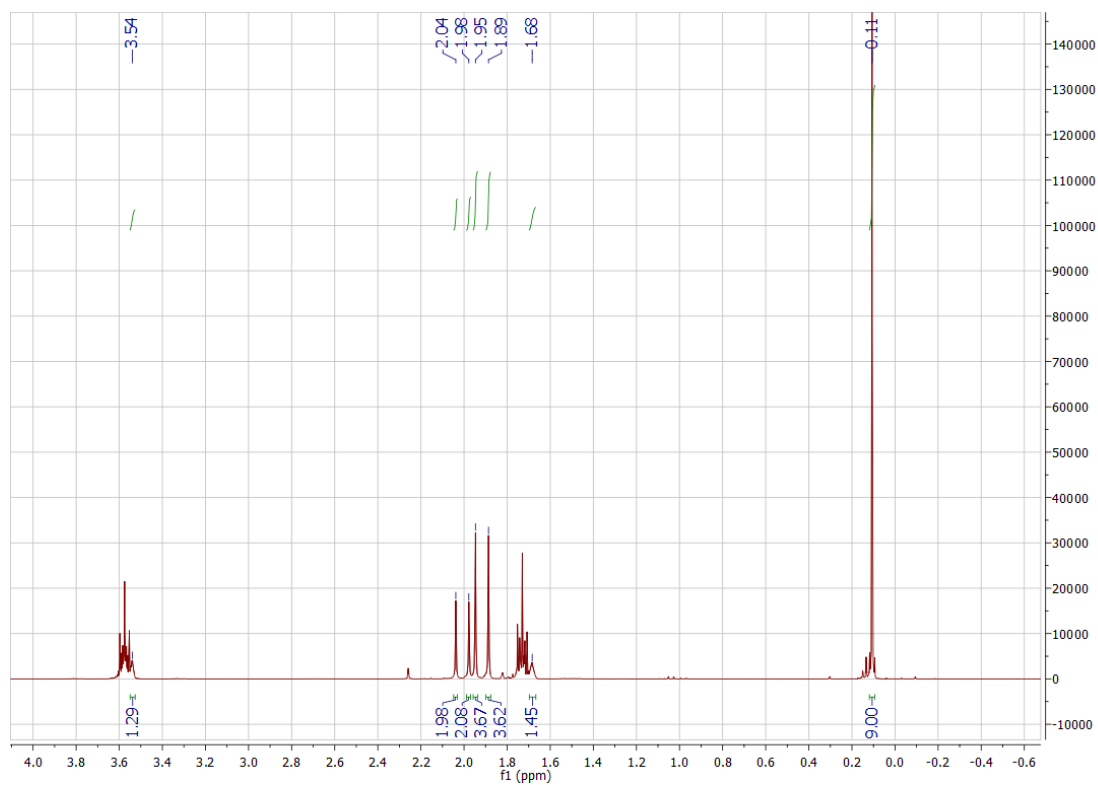

<sup>13</sup>C{<sup>1</sup>H} NMR (298K, 75 MHz, THF-D<sub>8</sub>)

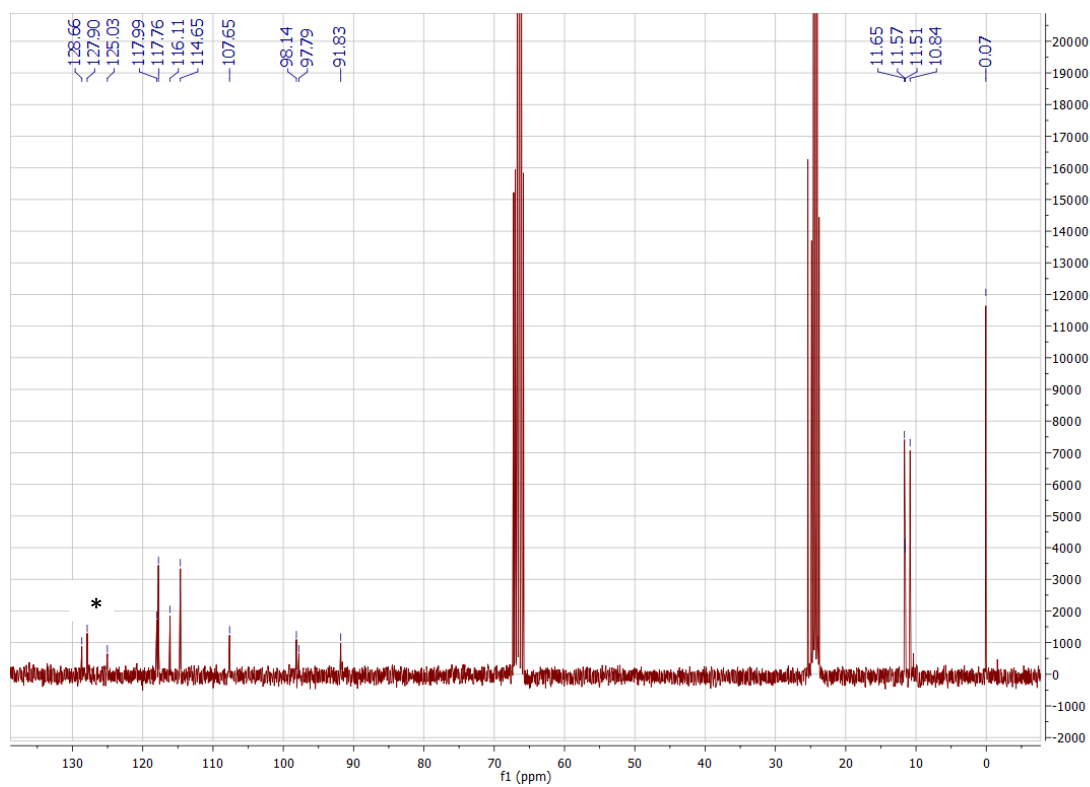



### 3. IR Spectra

#### 3.1 $[\text{NaCpMe}_4(\text{C}\equiv\text{CSiMe}_3)(\text{THF})_3] \text{ (1)}$

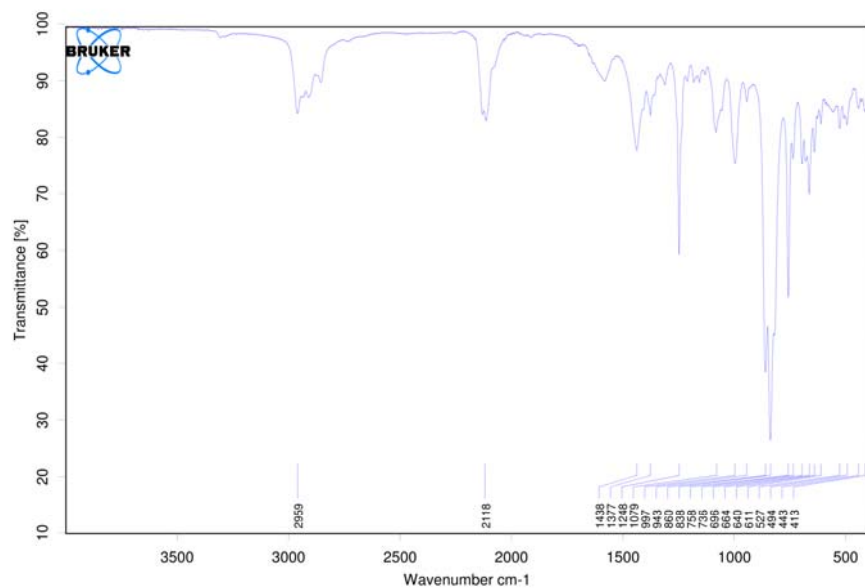

Z:\Tim Seifert\IR\tps213 NaCp.0 tps213 NaCp orangene Kristalle

Seite 1 von 2

#### 3.2 $[\text{KCpMe}_4(\text{C}\equiv\text{CSiMe}_3)(\text{THF})_2]_n \text{ (2)}$

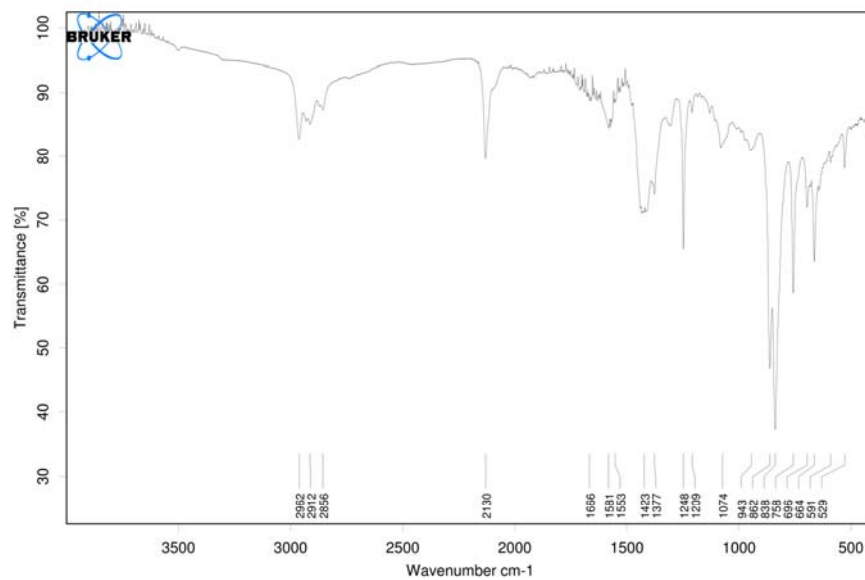

Z:\Tim Seifert\IR\tps214.0 tps214 KCp Rote Kristalle

Seite 1 von 2

### 3.3 [CpMe<sub>4</sub>(C≡CSiMe<sub>3</sub>)CaI(THF)<sub>2</sub>]<sub>2</sub> (**3**)

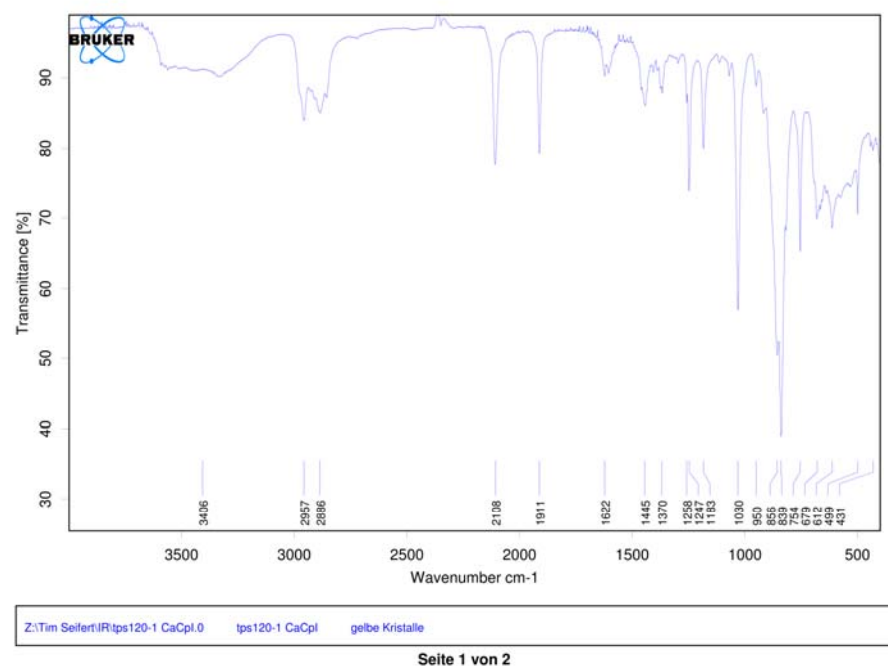

Seite 1 von 2

## 4. Mass spectra

[CpMe<sub>4</sub>(C≡CSiMe<sub>3</sub>)CaI(THF)<sub>2</sub>]<sub>2</sub> (**3**)

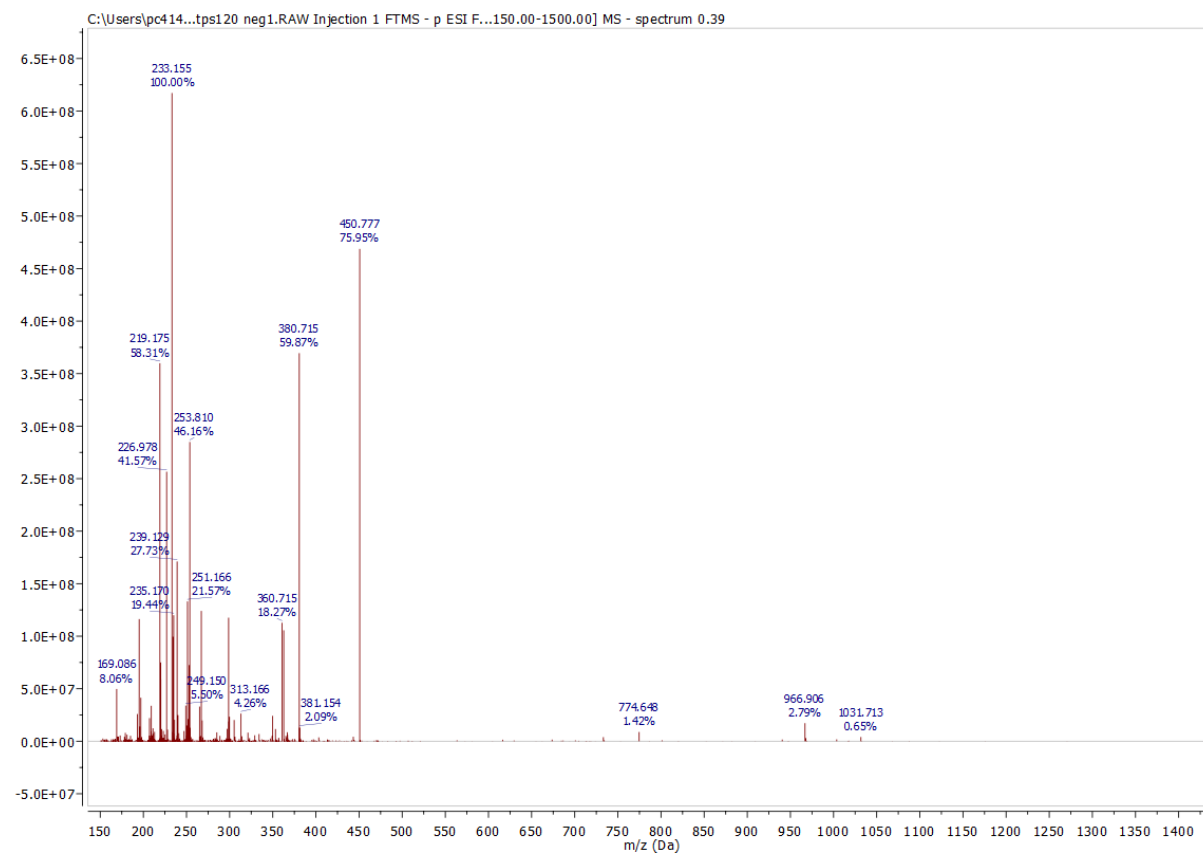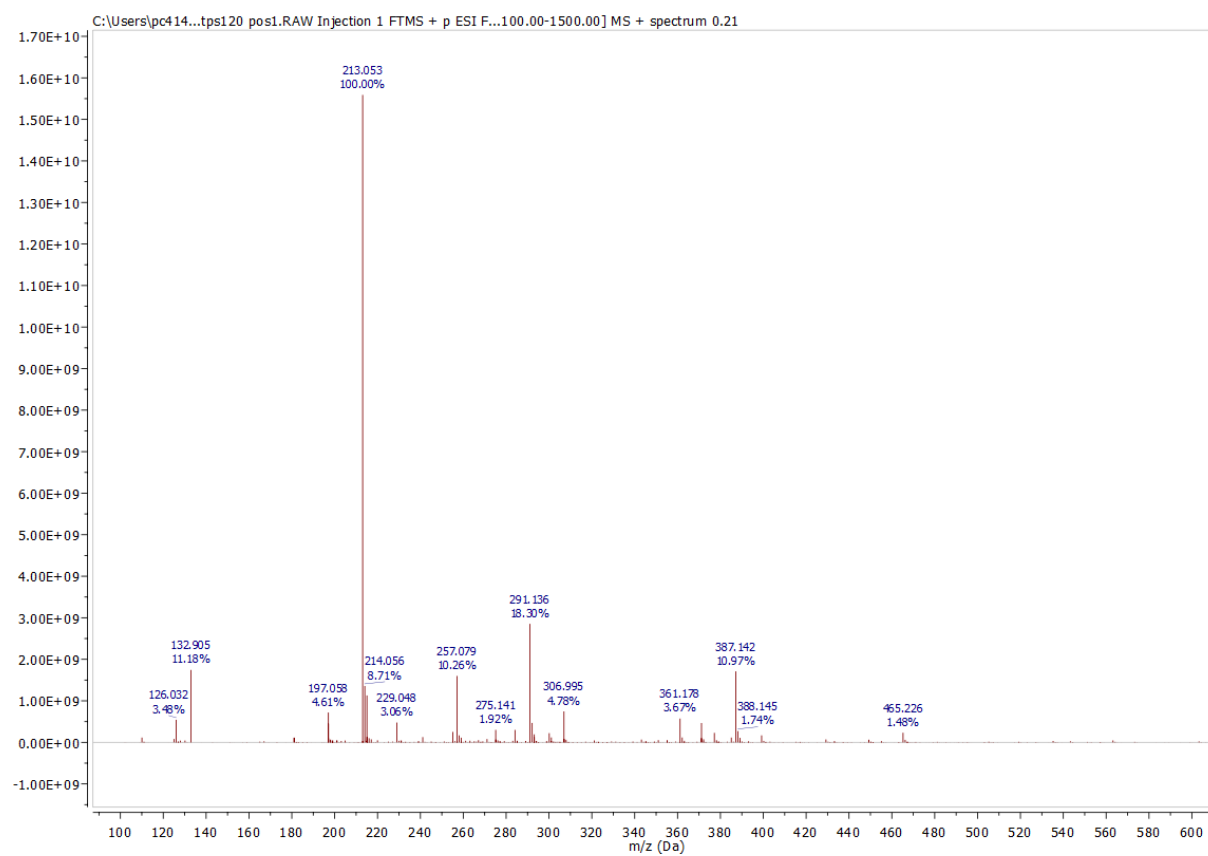

Supplement: s1 [file s1]
